# Supplementary material for: Inhibitory proteins block substrate access by occupying the active site cleft of Bacillus subtilis intramembrane protease SpoIVFB
Source: eLife journal article supplement (doi:10.7554/elife.74275), 2022-03-28
Supplement: fig1-data1 [file Fig 1C cleavage ratios.xlsx]

## Sheet: Sheet1
Figure 1C
		Set 1			Set 2			Set 3
Plasmid	Lane	Pro-sigK	CP	Ratio	Pro-sigK	CP	Ratio	Pro-sigK	CP	Ratio	Average	SD
pYZ2	1	5147604	16217424	0.759064	4200984	13896324	0.767867	2772612	8767260	0.759736	0.762222	0.00489982
pSO64	2	842616	3615228	0.810981	568512	2029248	0.781153	649764	1061892	0.620389	0.737508	0.102519
pSO65	3	6430464	9901872	0.606274	6027012	11043684	0.646938	5445468	6682968	0.551016	0.60141	0.0481455
pSO40	4	15267276	369828	0.0236507	15262704	276984	0.0178243	8422524	212328	0.0245897	0.0220215	0.00366511
CP - cleavage product
SD - standard deviation
