# Supplementary material for: Inhibitory proteins block substrate access by occupying the active site cleft of Bacillus subtilis intramembrane protease SpoIVFB
Source: eLife journal article supplement (doi:10.7554/elife.74275), 2022-03-28
Supplement: fig1-data1 [file Fig1B cleavage ratios.xlsx]

## Sheet: Sheet1
Figure 1B
		Set 1			Set 2			Set 3
Plasmid	Lane	Pro-sigK	CP	Ratio	Pro-sigK	CP	Ratio	Pro-sigK	CP	Ratio	Average	SD
pYZ2	1	625775	2499675	0.799781	545544	1840152	0.771327	624024	1935144	0.756161	0.775756	0.0221445
pYZ2+pYZ46	2	1506175	968475	0.391358	4679568	1889760	0.287664	2355912	720072	0.234095	0.304372	0.0799521
pYZ2+pSO2012	3	2051300	1011300	0.33021	5009304	1295232	0.205444	5340792	990336	0.156423	0.230692	0.089602
pSO40	4	1792300	29925	0.0164222	5599464	165720	0.028745	6234096	133368	0.0209452	0.0220375	0.00623355
pSO213	5	3528150	36000	0.0101006	5902416	68784	0.0115193	5927400	119616	0.019781	0.0138003	0.00522779
CP - cleavage product
SD - standard deviation
