# Supplementary material for: Inhibitory proteins block substrate access by occupying the active site cleft of Bacillus subtilis intramembrane protease SpoIVFB
Source: eLife journal article supplement (doi:10.7554/elife.74275), 2022-03-28
Supplement: fig1-figsupp2-data1 [file fig sup 2A cleavage ratios.xlsx]

## Sheet: Sheet1
figure supplement 2A
		Set 1			Set 2			Set 3
Plasmid	Lane	Pro-sigK	CP	Ratio	Pro-sigK	CP	Ratio	Pro-sigK	CP	Ratio	Average	SD
pYZ2	1	535800	3627974	0.871319	607183	3900529	0.865301	376827	2322142	0.860381	0.865667	0.00547793
pSO312	2	225910	623694	0.7341	109972	323171	0.746107	165661	368277	0.689737	0.723315	0.0296921
pSO40	3	1199812	71478	0.0562248	1275356	53124	0.0399886	1290518	65132	0.0480448	0.0480861	0.00811819
CP - cleavage product
SD - standard deviation
