# Supplementary material for: Inhibitory proteins block substrate access by occupying the active site cleft of Bacillus subtilis intramembrane protease SpoIVFB
Source: eLife journal article supplement (doi:10.7554/elife.74275), 2022-03-28
Supplement: fig1-figsupp2-data1 [file fig sup 2B cleavage ratios.xlsx]

## Sheet: Sheet1
figure supplement 2B
		Set 1			Set 2			Set 3
Plasmid	Lane	Pro-sigK	sigK	Ratio	Pro-sigK	sigK	Ratio	Pro-sigK	sigK	Ratio	Average	SD
pSO290	1	1489480	925820	0.383315	1677780	1014360	0.376786	2602400	1444620	0.356959	0.372353	0.0137256
pSO313	2	231880	203040	0.466844	247300	227840	0.479522	739580	619600	0.455863	0.46741	0.0118395
pSO314	3	1522600	659520	0.302238	1297520	783260	0.376426	1067240	940540	0.468448	0.382371	0.0832641
pSO315	4	3440140	1543240	0.309677	3331340	1337200	0.286428	3876000	1647860	0.298317	0.298141	0.0116257
pSO289	5	7331340	186820	0.0248492	3108740	120940	0.0374464	776240	25920	0.0323128	0.0315361	0.00633444
SD - standard deviation
