# Supplementary material for: Inhibitory proteins block substrate access by occupying the active site cleft of Bacillus subtilis intramembrane protease SpoIVFB
Source: eLife journal article supplement (doi:10.7554/elife.74275), 2022-03-28
Supplement: fig1-figsupp3-data1 [file fig sup 3 cleavage ratios.xlsx]

## Sheet: Sheet1
figure supplement 3
		Set 1			Set 2			Set 3
Plasmid	Lane	Pro-sigK	CP	Ratio	Pro-sigK	CP	Ratio	Pro-sigK	CP	Ratio	Average	SD
pSO40	1	5755706	149952	0.0253912	7924592	194974	0.0240129	7506243	264654	0.0340571	0.0278204	0.00544492		Plasmid	Ratios			p values
pSO241	2	5599792	2378112	0.298087	6129604	2785484	0.312446	6196932	3966786	0.390289	0.333607	0.0496098		pSO241	0.298087	0.312446	0.390289	0.0291114
pSO240	3	7173738	2187592	0.233684	9387468	1370547	0.127398	5129757	1359531	0.209504	0.190195	0.0557118		pSO240	0.233684	0.127398	0.209504
pSO252	4	6171088	568128	0.0843018	4442067	434862	0.0891672	3551985	457218	0.114042	0.095837	0.0159526		pSO252	0.0843018	0.0891672	0.114042	0.0144996
pSO253	5	7272848	271392	0.0359734	9225060	445874	0.0461045	5849307	378162	0.0607248	0.0476009	0.0124434		pSO253	0.0359734	0.0461045	0.0607248
pSO251	6	5620450	203808	0.034993	6494644	221078	0.0329195	8198766	350001	0.0409417	0.0362847	0.00416419
pSO254	7	7035336	108812	0.0152309	6364540	152932	0.0234649	6475950	206064	0.0308386	0.0231782	0.00780779
CP - cleavage product
SD - standard deviation
