# Supplementary material for: Inhibitory proteins block substrate access by occupying the active site cleft of Bacillus subtilis intramembrane protease SpoIVFB
Source: eLife journal article supplement (doi:10.7554/elife.74275), 2022-03-28
Supplement: fig1-figsupp4-data1 [file fig sup 4 cleavage ratios.xlsx]

## Sheet: Sheet1
figure supplement 4
		Set 1			Set 2			Set 3
Plasmid	Lane	Pro-sigK	CP	Ratio	Pro-sigK	CP	Ratio	Pro-sigK	CP	Ratio	Average	SD		Plasmid	Ratios			p value
pSO40	1	3075292	159874	0.0494176	8704175	379400	0.0417677	8677525	337200	0.0374055	0.0428636	0.00608057		pSO40	0.0494176	0.0417677	0.0374055	0.00392442
pSO193	2	2343022	450208	0.161178	5199200	741750	0.124854	4213775	993950	0.190861	0.158964	0.0330591		pSO193	0.161178	0.124854	0.190861
CP - cleavage product
SD - standard deviation
