# Supplementary material for: Inhibitory proteins block substrate access by occupying the active site cleft of Bacillus subtilis intramembrane protease SpoIVFB
Source: eLife journal article supplement (doi:10.7554/elife.74275), 2022-03-28
Supplement: fig2-data1 [file Fig 2 cleavage ratios.xlsx]

## Sheet: Sheet1
Figure 2
		Set 1			Set 2			Set 3
Plasmid	Lane	Pro-sigK	CP	Ratio	Pro-sigK	CP	Ratio	Pro-sigK	CP	Ratio	Average	SD
pSO40	1	11819828	242386	0.0200947	14160475	332220	0.0229233	9829638	246402	0.0244542	0.0224907	0.00221175
pSO44	2	6215098	313208	0.0479769	4044635	318500	0.072998	3766230	229437	0.0574215	0.0594654	0.0126351
pSO45	3	5105134	1622038	0.241117	2817150	791700	0.219377	4962204	1211613	0.19625	0.218915	0.0224371
pSO46	4	1823930	2109700	0.536324	1487465	1920625	0.563549	2267772	2127762	0.484074	0.527982	0.0403889
pSO47	5	10460780	220082	0.0206053	12755435	229845	0.0177004	10255440	188058	0.0180072	0.018771	0.00159594
pSO48	6	7991666	1657058	0.171739	11408775	2291695	0.167271	7336758	1334463	0.153896	0.164302	0.00928471
pSO49	7	1344462	1965098	0.593764	2062585	2279375	0.524965	1719198	2035527	0.542124	0.553618	0.0358109
pSO50	8	3408364	2229448	0.395446	3042060	2261875	0.426452	3373890	1919112	0.362575	0.394824	0.031943
pSO51	9	17314150	358190	0.0202684	12334630	189105	0.0150997	9512568	146484	0.0151655	0.0168445	0.00296534
pSO52	10	12162010	1144465	0.0860081	5758200	573650	0.0905975	11880645	1128960	0.086779	0.0877949	0.00245759
pSO53	11	11940740	1250165	0.0947748	10340645	1376270	0.11746	9692200	1322475	0.120065	0.110767	0.0139104
pSO54	12	13375986	557232	0.0399931	12151692	586008	0.0460058	12187800	668516	0.051999	0.0459993	0.00600299
pSO55	13	5955729	1420068	0.192531	6165864	2252772	0.267593	5374620	2056867	0.276777	0.245634	0.0462173
pSO56	14	6849726	1201551	0.149237	7190748	1682604	0.189624	5142593	1518628	0.22798	0.188947	0.0393759
pSO60	15	5839197	1675479	0.222961	8732628	3020508	0.256996	7852621	2548671	0.245034	0.241664	0.017266
pSO61	16	8550750	306657	0.0346215	7664724	412848	0.0511104	7393895	317201	0.0411357	0.0422892	0.00830474
pSO62	17	7575360	1039740	0.120688	8631036	1470636	0.145583	4471450	1223553	0.214847	0.160373	0.0487904
pSO63	18	16301454	903084	0.052491	15001308	776556	0.0492181	14686114	1178968	0.0743121	0.0586737	0.0136418
pSO57	19	16227393	1222182	0.0700408	8484640	688598	0.075066	8440674	798836	0.0864587	0.0771885	0.00841224
pSO58	20	12938172	672438	0.0494054	8938664	252928	0.0275173	8361140	324558	0.0373669	0.0380966	0.0109623
CP - cleavage product
SD - standard deviation
