# Supplementary material for: Inhibitory proteins block substrate access by occupying the active site cleft of Bacillus subtilis intramembrane protease SpoIVFB
Source: eLife journal article supplement (doi:10.7554/elife.74275), 2022-03-28
Supplement: fig2-figsupp2-data1 [file fig sup 2 GFPdelta27BofA levels.xlsx]

## Sheet: Sheet1
figure supplement 2
Plasmid	Lane	Set 1	Set 2	Set 3	Average	SD	p value
pZR62	1	5758592	10229440	7109056	7.69903e+06	2.29307e+06
pSO332	2	3856096	7891808	7545280	6.43106e+06	2.23671e+06	0.530633
pSO333	3	7522720	7389216	5193920	6701952	1.3077e+06	0.865101
pSO334	4	5871200	5480576	6707008	6.01959e+06	626538	0.460782
SD - standard deviation
p value - Student's two-tailed t tests were performed to compare the level of each variant to the level of GFPD27BofA produced from pZR62
