# Supplementary material for: Inhibitory proteins block substrate access by occupying the active site cleft of Bacillus subtilis intramembrane protease SpoIVFB
Source: eLife journal article supplement (doi:10.7554/elife.74275), 2022-03-28
Supplement: fig2-figsupp3-data1 [file fig sup 3A cleavage ratios.xlsx]

## Sheet: Sheet1
figure supplement 3A
		Set 1			Set 2			Set 3
Plasmid	Lane	Pro-sigK	CP	Ratio	Pro-sigK	CP	Ratio	Pro-sigK	CP	Ratio	Average	SD
pSO40	1	15267276	369828	0.0236507	15262704	276984	0.0178243	8422524	212328	0.0245897	0.0220215	0.00366511
pSO43	2	2878884	4457952	0.607612	2594520	3433176	0.569567	1475064	1954944	0.569953	0.582377	0.0218549
pSO63	3	16301454	903084	0.052491	15001308	776556	0.0492181	14686114	1178968	0.0743121	0.0586737	0.0136418
pSO57	4	16227393	1222182	0.0700408	8484640	688598	0.075066	8440674	798836	0.0864587	0.0771885	0.00841224
pSO58	5	12938172	672438	0.0494054	8938664	252928	0.0275173	8361140	324558	0.0373669	0.0380966	0.0109623
pSO67	6	4933638	4156874	0.457276	3977048	3660746	0.479294	4412724	3848868	0.465875	0.467482	0.0110963
CP - cleavage product
SD - standard deviation
