# Supplementary material for: Inhibitory proteins block substrate access by occupying the active site cleft of Bacillus subtilis intramembrane protease SpoIVFB
Source: eLife journal article supplement (doi:10.7554/elife.74275), 2022-03-28
Supplement: fig2-figsupp3-data1 [file fig sup 3B cleavage ratios.xlsx]

## Sheet: Sheet1
figure supplement 3B
		Set 1			Set 2			Set 3
Plasmid	Lane	Pro-sigK	CP	Ratio	Pro-sigK	CP	Ratio	Pro-sigK	CP	Ratio	Average	SD
pSO40	1	15267276	369828	0.0236507	15262704	276984	0.0178243	8422524	212328	0.0245897	0.0220215	0.00366511		Plasmid	Ratios			p value
pSO42	2	6022116	4060692	0.402734	4527936	2421036	0.348402	3370608	1243764	0.269541	0.340226	0.0669718		pSO42	0.402734	0.348402	0.269541	0.00516396
pSO69	3	4875702	641070	0.116204	5181940	818686	0.136433	8965392	957508	0.0964948	0.116377	0.0199699		pSO69	0.116204	0.136433	0.0964948
CP - cleavage product
SD - standard deviation
