# Supplementary material for: Inhibitory proteins block substrate access by occupying the active site cleft of Bacillus subtilis intramembrane protease SpoIVFB
Source: eLife journal article supplement (doi:10.7554/elife.74275), 2022-03-28
Supplement: fig3-data1 [file Fig 3A cleavage ratios.xlsx]

## Sheet: Sheet1
Figure 3A
		Set 1			Set 2			Set 3
Strain	Lane	Pro-sigK	SigK	Ratio	Pro-sigK	SigK	Ratio	Pro-sigK	SigK	Ratio	Average	SD		Strain	Ratios			p value
pY79- 4h	1	2258491	513938	0.185375	1558779	906471	0.367699	1841480	903355	0.329111	0.294062	0.0960829		pY79- 4h	0.185375	0.367699	0.329111	0.0162444
pY79- 5h	2	1246797	3340220	0.72819	1245279	2208560	0.639451	1607590	3475860	0.68376	0.6838	0.0443696		ZR264- 4h	0.703607	0.696378	0.505186
BK754- 4h	3	3032064	146202	0.0460006	1475160	109744	0.0692433	2915626	112385	0.0371151	0.0507863	0.0165901
BK754- 5h	4	5083785	414372	0.0753656	2695492	291783	0.0976753	5003574	567872	0.101925	0.0916554	0.0142666		BK754- 5h	0.0753656	0.0976753	0.101925	0.0438448
ZR264- 4h	5	984564	2337258	0.703607	632453	1450574	0.696378	1036982	1058718	0.505186	0.635057	0.11253		SO3- 5h	0.141678	0.26722	0.192084
ZR264- 5h	6	1314348	3992982	0.752352	1450574	1795443	0.553122	1363649	1844311	0.574917	0.626797	0.109279
SO3- 4h	7	952302	82911	0.0800908	947720	173945	0.155077	1688226	211660	0.111407	0.115525	0.0376626
SO3- 5h	8	2613915	431462	0.141678	2513681	916655	0.26722	3255270	773946	0.192084	0.200327	0.0631759
SO6- 4h	9	500482	1478826	0.747143	578778	1071885	0.649366	549670	914926	0.624695	0.673735	0.064759		SO6- 4h	0.747143	0.649366	0.624695	0.00479725
SO6- 5h	10	695710	2101166	0.751255	862030	2031214	0.702054	765301	2549382	0.769118	0.740809	0.0347307		SO10- 4h	0.414894	0.473757	0.430762
SO8- 4h	11	722274	2615858	0.783629	500517	1226241	0.710141	511043	1093906	0.681583	0.725118	0.0526459		SO8- 4h	0.783629	0.710141	0.681583	0.00124792
SO8- 5h	12	830908	3508014	0.808499	525426	2135847	0.802566	655063	2184031	0.76927	0.793445	0.021145		SO10- 4h	0.414894	0.473757	0.430762
SO10- 4h	13	1089385	772473	0.414894	559493	503690	0.473757	950988	719644	0.430762	0.439804	0.0304555
SO10- 5h	14	1182359	1920264	0.618916	948537	1807831	0.655874	1487396	2093154	0.58459	0.619794	0.0356502
SD - standard deviation
