# Supplementary material for: Inhibitory proteins block substrate access by occupying the active site cleft of Bacillus subtilis intramembrane protease SpoIVFB
Source: eLife journal article supplement (doi:10.7554/elife.74275), 2022-03-28
Supplement: fig3-data1 [file Table of FS localization of GFPdelta27BofA and the three variants revised.xlsx]

## Sheet: Sheet1
Forespore localization of GFPΔ27BofA and the three variants
		Count				Percentage
Strain		Discrete	Partial	None	Total	Discrete	Partial	None
SO3-3h	GFPΔ27BofA	92	1	0	93	0.989247	0.0107527	0
SO6- 3h	N48A	0	66	13	79	0	0.835443	0.164557
SO8- 3h	N61A	0	1	74	75	0	0.0133333	0.986667
SO10- 3h	T64A	0	34	10	44	0	0.772727	0.227273
