# Supplementary material for: Inhibitory proteins block substrate access by occupying the active site cleft of Bacillus subtilis intramembrane protease SpoIVFB
Source: eLife journal article supplement (doi:10.7554/elife.74275), 2022-03-28
Supplement: fig4-figsupp2-data1 [file fig sup 2 cleavage ratios.xlsx]

## Sheet: Sheet1
figure supplement 2
		Set 1			Set 2			Set 3
Plasmid	Lane	Pro-sigK	CP	Ratio	Pro-sigK	CP	Ratio	Pro-sigK	CP	Ratio	Average	SD
pYZ2	1	766332	2140530	0.736371	881034	3333015	0.790929	848799	2562462	0.751177	0.759493	0.0282135
pSO40	2	3828951	41622	0.0107534	2646000	60417	0.0223236	2505342	147630	0.055647	0.0295747	0.0233086
pSO90	3	5081685	72807	0.014125	3748878	62307	0.0163485	4998252	131292	0.0255953	0.0186896	0.00608297
pSO97	4	6321504	84756	0.0132302	3032442	73479	0.0236577	5457984	254667	0.0445795	0.0271558	0.0159647
CP - cleavage product
SD - standard deviation
