# Supplementary material for: Inhibitory proteins block substrate access by occupying the active site cleft of Bacillus subtilis intramembrane protease SpoIVFB
Source: eLife journal article supplement (doi:10.7554/elife.74275), 2022-03-28
Supplement: fig4-figsupp5-data1 [file fig sup 5B cleavage ratios.xlsx]

## Sheet: Sheet1
figure supplement 5B
		Set 1			Set 2			Set 3
Plasmid	Lane	Pro-sigK	CP	Ratio	Pro-sigK	CP	Ratio	Pro-sigK	CP	Ratio	Average	SD
pYZ2	1	878636	2901646	0.767574	1021250	3568618	0.777499	1095046	4596176	0.80759	0.784221	0.0208379
pSO141	2	850564	2523972	0.747946	910746	2949617	0.764078	391096	1186550	0.752102	0.754709	0.00837565
pSO256	3	891388	1076469	0.547026	1146270	2489038	0.684684	588373	1335453	0.694165	0.641958	0.0823505
pSO257	4	887846	2434711	0.732782	690840	3071369	0.816374	673246	2774722	0.804741	0.784632	0.0452787
pSO258	5	718382	1481016	0.673373	1163218	3644010	0.758027	785650	2277625	0.743526	0.724976	0.0452732
pSO259	6	1715685	3503682	0.671285	1072075	2506138	0.700388	924749	1958558	0.679275	0.683649	0.0150367
pSO40	7	2973102	22924	0.00765147	7111566	173313	0.0237908	7597320	236760	0.0302218	0.0205547	0.011628
pSO142	8	2644356	45012	0.016737	4709313	153909	0.0316475	6828885	251181	0.0354772	0.0279539	0.00990105
pSO143	9	3881922	99066	0.0248848	2639847	111720	0.0406023	2601732	113862	0.0419289	0.0358053	0.00948072
pSO260	10	1091741	106743	0.089065	934962	114849	0.1094	908880	116193	0.113351	0.103939	0.0130315
pSO261	11	4119645	98831	0.0234281	5298594	280161	0.0502193	3842853	100590	0.0255082	0.0330519	0.0149037
pSO262	12	4127350	95427	0.0225982	4848312	259077	0.0507259	4674138	173523	0.0357952	0.0363731	0.0140728
pSO263	13	4696163	346495	0.0687128	6164634	651609	0.0955965	5417811	591927	0.0984946	0.0876013	0.016422
CP - cleavage product
SD - standard deviation
