# Supplementary material for: Inhibitory proteins block substrate access by occupying the active site cleft of Bacillus subtilis intramembrane protease SpoIVFB
Source: eLife journal article supplement (doi:10.7554/elife.74275), 2022-03-28
Supplement: fig5-data1 [file Fig 5B complex to total ratios.xlsx]

## Sheet: Sheet1
Figure 5B
		15 minutes								30 minutes								45 minutes								60 minutes
		Set 1				Set 2				Set 1				Set 2				Set 1				Set 2				Set 1				Set 2
Plasmid		Complex	Monomer	Dimer	Ratio	Complex	Monomer	Dimer	Ratio	Complex	Monomer	Dimer	Ratio	Complex	Monomer	Dimer	Ratio	Complex	Monomer	Dimer	Ratio	Complex	Monomer	Dimer	Ratio	Complex	Monomer	Dimer	Ratio	Complex	Monomer	Dimer	Ratio
pSO130	No BofA	331938	2427282	526752	0.101017	979830	2940668	727130	0.210824	574272	3332160	702072	0.124611	336490	2731706	186941	0.103372	994821	3270204	417069	0.212474	1244880	3473561	257773	0.250166	1102893	3259032	596144	0.222444	1022846	2674193	433713	0.247617
pSO133	MBPD27BofA	426987	2021467	270921	0.157017	1068712	2802956	105431	0.268716	624530	3128084	699865	0.140266	1282158	3977479	528941	0.221498	874133	4444290	1612207	0.126126	1224151	3667627	260908	0.237575	883899	3951886	1495889	0.1396	1494825	4351437	330752	0.241998
pSO246	BofA	1415766	3213717	1605804	0.227057	2624337	4999527	3398872	0.238084	1491956	3600823	1785240	0.216917	2383265	4768867	3021950	0.234249	1167683	2426813	1396842	0.233942	2287144	3106975	1963935	0.310835	1077965	2556450	1596000	0.206096	2197369	3220424	2288208	0.28515
pSO255	Cys-less	123462	3621457	1253164	0.0247019	44840	2661577	782287	0.0128529	130283	3075663	1466173	0.0278852	48792	2787984	1984740	0.0101196	178030	3854112	1748893	0.0307955	115007	3105702	1976893	0.0221269	204763	3906856	1429047	0.0369564	56449	3815770	1550172	0.0104104
	Ratios
	15	15	30	30	45	45	60	60
No BofA	0.101017	0.210824	0.124611	0.103372	0.212474	0.250166	0.222444	0.247617
MBPD27BofA	0.157017	0.268716	0.140266	0.221498	0.126126	0.237575	0.1396	0.241998
BofA	0.227057	0.238084	0.216917	0.234249	0.233942	0.310835	0.206096	0.28515
Cys-less	0.0247019	0.0128529	0.0278852	0.0101196	0.0307955	0.0221269	0.0369564	0.0104104
