# Supplementary material for: Inhibitory proteins block substrate access by occupying the active site cleft of Bacillus subtilis intramembrane protease SpoIVFB
Source: eLife journal article supplement (doi:10.7554/elife.74275), 2022-03-28
Supplement: fig5-figsupp3-data1 [file fig sup 3B cleavage ratios.xlsx]

## Sheet: Sheet1
figure supplement 1B
		Set 1			Set 2			Set 3
Plasmid	Lane	Pro-sigK	CP	Ratio	Pro-sigK	CP	Ratio	Pro-sigK	CP	Ratio	Average	SD
pYZ2	1	912580	2985000	0.76586	1129284	4809432	0.809844	717535	3493302	0.829598	0.801767	0.0326276
pSO157	2	1534020	3953000	0.720427	1429028	5657212	0.798338	740734	2184620	0.746788	0.755184	0.0396279
pSO158	3	877980	3338180	0.791758	984922	4445373	0.818625	793706	3048075	0.793402	0.801262	0.0150593
pSO159	4	881440	2787820	0.759777	617139	1490075	0.70713	802712	2963943	0.78689	0.751266	0.0405553
pSO160	5	825900	3126340	0.79103	702601	2412886	0.774481	751849	2788763	0.78765	0.784387	0.00874359
CP - cleavage product
SD - standard deviation
