# Supplementary material for: Inhibitory proteins block substrate access by occupying the active site cleft of Bacillus subtilis intramembrane protease SpoIVFB
Source: eLife journal article supplement (doi:10.7554/elife.74275), 2022-03-28
Supplement: fig6-data1 [file Fig6A compex to total ratios.xlsx]

## Sheet: Sheet1
Figure 6A
		15 minutes								30 minutes								45 minutes								60 minutes
		Set 1				Set 2				Set 1				Set 2				Set 1				Set 2				Set 1				Set 2
Plasmid		Complex	Monomer	Dimer	Ratio	Complex	Monomer	Dimer	Ratio	Complex	Monomer	Dimer	Ratio	Complex	Monomer	Dimer	Ratio	Complex	Monomer	Dimer	Ratio	Complex	Monomer	Dimer	Ratio	Complex	Monomer	Dimer	Ratio	Complex	Monomer	Dimer	Ratio
pSO167	F18C	157980	6505760	403960	0.0223524	421784	11635162	2535676	0.0289039	161420	6951600	835420	0.0203084	522324	9295792	2843742	0.0412518	304440	8106900	1640040	0.0302884	427177	5541141	1715643	0.0555933	336860	8683080	1429060	0.0322385	377640	8020080	3156240	0.0326849
pSO169	V20C	1033662	7233933	719040	0.115022	1028192	7963208	1041458	0.102482	1235220	7521360	727840	0.130237	1148600	8112620	1323400	0.108516	1810556	8121146	1011428	0.165451	695191	4483031	679212	0.118685	2788980	8525780	1556220	0.216687	1503020	7104980	1407840	0.150064
pSO170	S21C	198177	8191575	453705	0.0224094	180730	7313284	899580	0.0215319	166040	7704440	524020	0.0197796	111298	6039022	437888	0.0168935	235972	8093140	584804	0.0264723	106761	5741648	471523	0.0168927	377440	9878140	915560	0.0337871	209380	5813840	572320	0.0317457
pSO128	K24C	554022	5251029	551355	0.0871596	570548	5855388	1697014	0.070239	798420	5376400	1017860	0.111005	585750	4023734	1172358	0.101309	833514	4006090	1357312	0.134505	613434	4249654	1201883	0.101144	1513440	4714080	2142680	0.180813	662840	4488420	1092020	0.106169
pSO79	Cys-less	87406	9556734	549714	0.00857438	38052	8265453	623280	0.00426268	18260	7380384	657910	0.00226648	75096	6794277	610680	0.0100395	118797	7898562	716562	0.0136018	63210	7498974	821352	0.00753978	85866	7523626	599258	0.0104603	44880	9155938	1653454	0.00413478
	Ratios
	15	15	30	30	45	45	60	60
F18C	0.0223524	0.0289039	0.0203084	0.0412518	0.0302884	0.0555933	0.0322385	0.0326849
V20C	0.115022	0.102482	0.130237	0.108516	0.165451	0.118685	0.216687	0.150064
S21C	0.0224094	0.0215319	0.0197796	0.0168935	0.0264723	0.0168927	0.0337871	0.0317457
K24C	0.0871596	0.070239	0.111005	0.101309	0.134505	0.101144	0.180813	0.106169
Cys-less	0.00857438	0.00426268	0.00226648	0.0100395	0.0136018	0.00753978	0.0104603	0.00413478
