# Supplementary material for: Inhibitory proteins block substrate access by occupying the active site cleft of Bacillus subtilis intramembrane protease SpoIVFB
Source: eLife journal article supplement (doi:10.7554/elife.74275), 2022-03-28
Supplement: fig6-data1 [file Fig6C complex to total ratios.xlsx]

## Sheet: Sheet1
Figure 6C
		15 minutes								30 minutes								45 minutes								60 minutes
		Set 1				Set 2				Set 1				Set 2				Set 1				Set 2				Set 1				Set 2
Plasmid		Complex	Monomer	Dimer	Ratio	Complex	Monomer	Dimer	Ratio	Complex	Monomer	Dimer	Ratio	Complex	Monomer	Dimer	Ratio	Complex	Monomer	Dimer	Ratio	Complex	Monomer	Dimer	Ratio	Complex	Monomer	Dimer	Ratio	Complex	Monomer	Dimer	Ratio
pSO163	F18C	150440	5929020	1109520	0.0209265	32360	3719100	461840	0.00768044	105317	4131113	1470600	0.0184539	58501	3854169	706743	0.0126642	173448	5500902	2057660	0.0224325	64144	3136083	679953	0.0165312	172304	7577328	3618934	0.0151562	31179	2681261	719397	0.00908522
pSO165	V20C	325300	5276000	978840	0.0494366	145420	4408954	648494	0.02795	221559	3687653	986651	0.0452543	119130	4623840	776948	0.0215818	358688	4285754	1473472	0.0586291	208411	3241305	562514	0.0519439	260326	3606548	1388024	0.0495397	229254	3511580	707769	0.0515339
pSO166	S21C	135140	5030600	1202820	0.0212199	14014	2688158	278740	0.00470125	51920	7586106	2007896	0.00538259	61218	3868476	740791	0.0131074	126698	4803040	1227754	0.0205762	79933	3872371	787474	0.0168643	83534	4184180	1044714	0.0157243	26334	4397550	922165	0.00492588
pSO131	K24C	314720	5168300	1486120	0.0451591	221613	5045040	739326	0.0368987	388850	6794854	2409880	0.0405323	151392	4087014	960355	0.0291208	212630	4426994	1732280	0.0333699	146566	2911674	825873	0.0377347	243078	3573284	1340592	0.047136	100358	2046034	404187	0.0393471
pSO110	Cys-less	17380	3385316	309628	0.0046817	24320	3975788	323969	0.00562432	18678	2521024	308110	0.00655872	26106	3511409	404168	0.00662306	15897	1905078	245490	0.00733776	44745	5137486	726940	0.00757213	17996	2813910	449680	0.00548393	44289	4620667	701727	0.00825258
	Ratios
	15	15	30	30	45	45	60	60
F18C	0.0209265	0.00768044	0.0184539	0.0126642	0.0224325	0.0165312	0.0151562	0.00908522
V20C	0.0494366	0.02795	0.0452543	0.0215818	0.0586291	0.0519439	0.0495397	0.0515339
S21C	0.0212199	0.00470125	0.00538259	0.0131074	0.0205762	0.0168643	0.0157243	0.00492588
K24C	0.0451591	0.0368987	0.0405323	0.0291208	0.0333699	0.0377347	0.047136	0.0393471
Cys-less	0.0046817	0.00562432	0.00655872	0.00662306	0.00733776	0.00757213	0.00548393	0.00825258
