# Supplementary material for: Inhibitory proteins block substrate access by occupying the active site cleft of Bacillus subtilis intramembrane protease SpoIVFB
Source: eLife journal article supplement (doi:10.7554/elife.74275), 2022-03-28
Supplement: fig6-data1 [file Fig6E complex to total ratios.xlsx]

## Sheet: Sheet1
Figure 6E
		15 minutes								30 minutes								45 minutes								60 minutes
		Set 1				Set 2				Set 1				Set 2				Set 1				Set 2				Set 1				Set 2
Plasmid		Complex	Monomer	Dimer	Ratio	Complex	Monomer	Dimer	Ratio	Complex	Monomer	Dimer	Ratio	Complex	Monomer	Dimer	Ratio	Complex	Monomer	Dimer	Ratio	Complex	Monomer	Dimer	Ratio	Complex	Monomer	Dimer	Ratio	Complex	Monomer	Dimer	Ratio
pSO169	No BofA	1033662	7233933	719040	0.115022	1028192	7963208	1041458	0.102482	1235220	7521360	727840	0.130237	1148600	8112620	1323400	0.108516	1810556	8121146	1011428	0.165451	695191	4483031	679212	0.118685	2788980	8525780	1556220	0.216687	1503020	7104980	1407840	0.150064
pSO165	MBPD27BofA	325300	5276000	978840	0.0494366	145420	4408954	648494	0.02795	221559	3687653	986651	0.0452543	119130	4623840	776948	0.0215818	358688	4285754	1473472	0.0586291	208411	3241305	562514	0.0519439	260326	3606548	1388024	0.0495397	229254	3511580	707769	0.0515339
pSO234	BofA	145098	2845260	543618	0.041058	361020	4655486	1668546	0.0540041	281001	4487133	1664124	0.0436862	325261	6240151	2445300	0.0360971	244511	2942530	1260099	0.0549816	195016	5623791	1853260	0.025419	364059	3241856	2272951	0.0619267	368714	5208261	2661349	0.0447559
pSO79	Cys-less	87406	9556734	549714	0.00857438	38052	8265453	623280	0.00426268	18260	7380384	657910	0.00226648	75096	6794277	610680	0.0100395	118797	7898562	716562	0.0136018	63210	7498974	821352	0.00753978	85866	7523626	599258	0.0104603	44880	9155938	1653454	0.00413478
	Ratios
	15	15	30	30	45	45	60	60
No BofA	0.115022	0.102482	0.130237	0.108516	0.165451	0.118685	0.216687	0.150064
MBPD27BofA	0.0494366	0.02795	0.0452543	0.0215818	0.0586291	0.0519439	0.0495397	0.0515339
BofA	0.041058	0.0540041	0.0436862	0.0360971	0.0549816	0.025419	0.0619267	0.0447559
Cys-less	0.00857438	0.00426268	0.00226648	0.0100395	0.0136018	0.00753978	0.0104603	0.00413478
