# Supplementary material for: Inhibitory proteins block substrate access by occupying the active site cleft of Bacillus subtilis intramembrane protease SpoIVFB
Source: eLife journal article supplement (doi:10.7554/elife.74275), 2022-03-28
Supplement: fig6-data1 [file Fig6F complex to total ratios.xlsx]

## Sheet: Sheet1
Figure 6F
		15 minutes								30 minutes								45 minutes								60 minutes
		Set 1				Set 2				Set 1				Set 2				Set 1				Set 2				Set 1				Set 2
Plasmid		Complex	Monomer	Dimer	Ratio	Complex	Monomer	Dimer	Ratio	Complex	Monomer	Dimer	Ratio	Complex	Monomer	Dimer	Ratio	Complex	Monomer	Dimer	Ratio	Complex	Monomer	Dimer	Ratio	Complex	Monomer	Dimer	Ratio	Complex	Monomer	Dimer	Ratio
pSO128	No BofA	554022	5251029	551355	0.0871596	570548	5855388	1697014	0.070239	798420	5376400	1017860	0.111005	585750	4023734	1172358	0.101309	833514	4006090	1357312	0.134505	613434	4249654	1201883	0.101144	1513440	4714080	2142680	0.180813	662840	4488420	1092020	0.106169
pSO131	MBPD27BofA	314720	5168300	1486120	0.0451591	221613	5045040	739326	0.0368987	388850	6794854	2409880	0.0405323	151392	4087014	960355	0.0291208	212630	4426994	1732280	0.0333699	146566	2911674	825873	0.0377347	243078	3573284	1340592	0.047136	100358	2046034	404187	0.0393471
pSO239	BofA	166482	2808252	543150	0.0473245	417582	5155062	1993860	0.0551882	374640	6001632	2569476	0.0418791	270446	4441022	2405457	0.0380004	296020	3971855	1968191	0.047469	178163	4749297	2798320	0.0230608	174534	2379427	907345	0.0504243	286805	5170299	3493245	0.032044
pSO79	Cys-less	87406	9556734	549714	0.00857438	38052	8265453	623280	0.00426268	18260	7380384	657910	0.00226648	75096	6794277	610680	0.0100395	118797	7898562	716562	0.0136018	63210	7498974	821352	0.00753978	85866	7523626	599258	0.0104603	44880	9155938	1653454	0.00413478
	Ratios
	15	15	30	30	45	45	60	60
No BofA	0.0871596	0.070239	0.111005	0.101309	0.134505	0.101144	0.180813	0.106169
MBPD27BofA	0.0451591	0.0368987	0.0405323	0.0291208	0.0333699	0.0377347	0.047136	0.0393471
BofA	0.0473245	0.0551882	0.0418791	0.0380004	0.047469	0.0230608	0.0504243	0.032044
Cys-less	0.00857438	0.00426268	0.00226648	0.0100395	0.0136018	0.00753978	0.0104603	0.00413478
