# Supplementary material for: Inhibitory proteins block substrate access by occupying the active site cleft of Bacillus subtilis intramembrane protease SpoIVFB
Source: eLife journal article supplement (doi:10.7554/elife.74275), 2022-03-28
Supplement: fig6-data1 [file Fig6G complex to total ratios.xlsx]

## Sheet: Sheet1
Figure 6G
		15 minutes								30 minutes								45 minutes								60 minutes
		Set 1				Set 2				Set 1				Set 2				Set 1				Set 2				Set 1				Set 2
Plasmid		Complex	Monomer	Dimer	Ratio	Complex	Monomer	Dimer	Ratio	Complex	Monomer	Dimer	Ratio	Complex	Monomer	Dimer	Ratio	Complex	Monomer	Dimer	Ratio	Complex	Monomer	Dimer	Ratio	Complex	Monomer	Dimer	Ratio	Complex	Monomer	Dimer	Ratio
pSO168	No BofA	1569498	3221841	565677	0.29298	1636778	4555870	1321628	0.217822	1968660	2564200	461380	0.394186	2001186	3865884	1085018	0.287854	2843100	2850440	560520	0.454601	3585920	5243740	440660	0.386817	2832240	2550460	619000	0.471906	3757687	2838638	396359	0.537374
pSO164	MBPD27BofA	950140	3876080	1105280	0.160185	374500	1955360	300580	0.142372	2312376	5196312	1550098	0.255263	957163	3048987	1037229	0.189786	1055868	3490300	742588	0.199644	1151856	2799080	690023	0.248194	2066614	4998620	1246674	0.248633	1258769	3357471	919030	0.227409
pSO236	BofA	674793	2301768	1682163	0.144845	447280	2287700	1942720	0.0956196	838880	2712180	2516340	0.13826	505540	2382980	675360	0.141851	871872	2657302	3929713	0.11689	470799	2189586	1634829	0.10961	563800	1524740	1926520	0.140421	431642	1889987	1123033	0.125308
pSO136	Cys-less	65670	8439882	4699508	0.00497309	53333	4981572	3556648	0.00620761	363000	5563448	4035196	0.0364398	49412	6801520	3336124	0.00485047	25830	5983131	1128645	0.00361886	202426	6328862	5277098	0.0171426	85734	7208234	4509010	0.00726376	74119	5732471	6328862	0.00610764
	Ratios
	15	15	30	30	45	45	60	60
No BofA	0.29298	0.217822	0.394186	0.287854	0.454601	0.386817	0.471906	0.537374
MBPD27BofA	0.160185	0.142372	0.255263	0.189786	0.199644	0.248194	0.248633	0.227409
BofA	0.144845	0.0956196	0.13826	0.141851	0.11689	0.10961	0.140421	0.125308
Cys-less	0.00497309	0.00620761	0.0364398	0.00485047	0.00361886	0.0171426	0.00726376	0.00610764
