# Supplementary material for: Inhibitory proteins block substrate access by occupying the active site cleft of Bacillus subtilis intramembrane protease SpoIVFB
Source: eLife journal article supplement (doi:10.7554/elife.74275), 2022-03-28
Supplement: fig6-data1 [file Fig6H complex to total ratios.xlsx]

## Sheet: Sheet1
Figure 6H
		15 minutes								30 minutes								45 minutes								60 minutes
		Set 1				Set 2				Set 1				Set 2				Set 1				Set 2				Set 1				Set 2
Plasmid		Complex	Monomer	Dimer	Ratio	Complex	Monomer	Dimer	Ratio	Complex	Monomer	Dimer	Ratio	Complex	Monomer	Dimer	Ratio	Complex	Monomer	Dimer	Ratio	Complex	Monomer	Dimer	Ratio	Complex	Monomer	Dimer	Ratio	Complex	Monomer	Dimer	Ratio
pSO134	No BofA	5999048	3268804	317130	0.62588	2019930	2019908	596376	0.435685	4294950	2484020	304634	0.606323	1321298	1609608	272448	0.412473	6016032	2569248	468512	0.664476	3772820	3028540	231700	0.536441	6762426	3167076	543862	0.645679	4127959	2506119	443004	0.583285
pSO132	MBPD27BofA	1519140	2769600	667640	0.306502	3781365	4476969	2045673	0.36698	2316960	3445480	1269820	0.329476	3088239	3438141	437976	0.443435	2428840	3469800	1459420	0.330092	2343745	2747913	970311	0.386631	2213680	3415320	1284580	0.320193	2468233	3064586	1062822	0.374222
pSO237	BofA	508599	2126880	1379637	0.126671	534600	2391060	2510660	0.0983386	1027780	2595440	2173620	0.1773	520000	2562840	695160	0.137639	822662	2699387	3349434	0.119721	399819	1424745	1037001	0.13972	544780	1455160	1783400	0.143994	877914	2236433	1181686	0.204355
pSO136	Cys-less	65670	8439882	4699508	0.00497309	53333	4981572	3556648	0.00620761	363000	5563448	4035196	0.0364398	49412	6801520	3336124	0.00485047	25830	5983131	1128645	0.00361886	202426	6328862	5277098	0.0171426	85734	7208234	4509010	0.00726376	74119	5732471	6328862	0.00610764
	Ratios
	15	15	30	30	45	45	60	60
No BofA	0.62588	0.435685	0.606323	0.412473	0.664476	0.536441	0.645679	0.583285
MBPD27BofA	0.306502	0.36698	0.329476	0.443435	0.330092	0.386631	0.320193	0.374222
BofA	0.126671	0.0983386	0.1773	0.137639	0.119721	0.13972	0.143994	0.204355
Cys-less	0.00497309	0.00620761	0.0364398	0.00485047	0.00361886	0.0171426	0.00726376	0.00610764
