# Supplementary material for: Inhibitory proteins block substrate access by occupying the active site cleft of Bacillus subtilis intramembrane protease SpoIVFB
Source: eLife journal article supplement (doi:10.7554/elife.74275), 2022-03-28
Supplement: fig6-data1 [file Fig6I complex to total ratios.xlsx]

## Sheet: Sheet1
Figure 6I
		15 minutes								30 minutes								45 minutes								60 minutes
		Set 1				Set 2				Set 1				Set 2				Set 1				Set 2				Set 1				Set 2
Plasmid		Complex	Monomer	Dimer	Ratio	Complex	Monomer	Dimer	Ratio	Complex	Monomer	Dimer	Ratio	Complex	Monomer	Dimer	Ratio	Complex	Monomer	Dimer	Ratio	Complex	Monomer	Dimer	Ratio	Complex	Monomer	Dimer	Ratio	Complex	Monomer	Dimer	Ratio
pSO120	No BofA	1004166	1021050	141732	0.463401	2424818	2288778	280839	0.485504	2530692	2341512	377730	0.482043	1763333	1869372	216771	0.458071	2684548	2482597	452428	0.477714	2411689	2125435	280003	0.500649	2592816	2057320	314849	0.52222	2600853	1651765	358207	0.564075
pSO127	MBPD27BofA	1570863	3009296	639350	0.30096	984333	1792916	262428	0.323828	1741464	3615453	828590	0.281539	1478428	2209149	466393	0.355907	1751838	3138743	890853	0.303011	1236330	2021923	468597	0.331736	1729532	3453611	1187405	0.271489	1438718	2328260	596258	0.329736
pSO245	BofA	810027	3103004	611895	0.179014	1088567	4876274	2140426	0.134304	1537936	5311526	2796040	0.159446	1294052	5290930	2168527	0.147832	1262759	3854454	1741540	0.184109	1138879	3690370	1622391	0.176526	1397203	3591057	1590889	0.212368	1215905	3261502	1515136	0.202903
pSO114	Cys-less	221844	6129419	1159152	0.0295382	121296	5945667	1266258	0.0165406	205124	5125288	1198178	0.0314193	124152	4976328	1141896	0.0198886	230679	5624228	1493020	0.0313938	77910	5345193	1741005	0.010875	170734	4973611	1508999	0.0256614	49287	5262537	1618995	0.00711128
	Ratios
	15	15	30	30	45	45	60	60
No BofA	0.463401	0.485504	0.482043	0.458071	0.477714	0.500649	0.52222	0.564075
MBPD27BofA	0.30096	0.323828	0.281539	0.355907	0.303011	0.331736	0.271489	0.329736
BofA	0.179014	0.134304	0.159446	0.147832	0.184109	0.176526	0.212368	0.202903
Cys-less	0.0295382	0.0165406	0.0314193	0.0198886	0.0313938	0.010875	0.0256614	0.00711128
