# Supplementary material for: Inhibitory proteins block substrate access by occupying the active site cleft of Bacillus subtilis intramembrane protease SpoIVFB
Source: eLife journal article supplement (doi:10.7554/elife.74275), 2022-03-28
Supplement: fig6-figsupp2-data1 [file figure supplement 2B complex to total ratios.xlsx]

## Sheet: Sheet1
figure supplement 2B
		15 minutes								30 minutes								45 minutes								60 minutes
		Set 1				Set 2				Set 1				Set 2				Set 1				Set 2				Set 1				Set 2
Plasmid		Complex	Monomer	Dimer	Ratio	Complex	Monomer	Dimer	Ratio	Complex	Monomer	Dimer	Ratio	Complex	Monomer	Dimer	Ratio	Complex	Monomer	Dimer	Ratio	Complex	Monomer	Dimer	Ratio	Complex	Monomer	Dimer	Ratio	Complex	Monomer	Dimer	Ratio
pSO238	F18C	165726	3934242	1525968	0.0294575	160996	4490068	1780526	0.0250321	535521	6103146	3275853	0.0540138	386156	6500850	3688869	0.0365129	346080	5279127	2872653	0.0407255	216581	5542148	2727754	0.0255207	450642	5825324	2777629	0.0497749	289313	5001522	3592767	0.0325671
pSO234	V20C	145098	2845260	543618	0.041058	361020	4655486	1668546	0.0540041	281001	4487133	1664124	0.0436862	325261	6240151	2445300	0.0360971	244511	2942530	1260099	0.0549816	195016	5623791	1853260	0.025419	364059	3241856	2272951	0.0619267	368714	5208261	2661349	0.0447559
pSO235	S21C	59778	2696274	631926	0.0176442	63998	5483632	1240580	0.00942782	58485	3146787	915957	0.0141912	51072	5912458	2225983	0.00623627	92400	3438708	1951089	0.0168546	66804	5770832	2010314	0.00851229	65626	3278260	1123812	0.014689	47804	4920924	2200086	0.00666833
pSO239	K24C	166482	2808252	543150	0.0473245	417582	5155062	1993860	0.0551882	374640	6001632	2569476	0.0418791	270446	4441022	2405457	0.0380004	296020	3971855	1968191	0.047469	178163	4749297	2798320	0.0230608	174534	2379427	907345	0.0504243	286805	5170299	3493245	0.032044
pSO229	Cys-less	61380	5809360	2412820	0.00740986	88040	7053420	970140	0.0108536	26180	5205420	2674960	0.00331117	64988	4180814	1299430	0.0117196	41140	3864020	2689340	0.00623853	29946	2427642	581721	0.0098529	47420	5014480	3760200	0.00537514	35780	5339640	1522400	0.00518715
	Ratios
	15	15	30	30	45	45	60	60
F18C	0.0294575	0.0250321	0.0540138	0.0365129	0.0407255	0.0255207	0.0497749	0.0325671
V20C	0.041058	0.0540041	0.0436862	0.0360971	0.0549816	0.025419	0.0619267	0.0447559
S21C	0.0176442	0.00942782	0.0141912	0.00623627	0.0168546	0.00851229	0.014689	0.00666833
K24C	0.0473245	0.0551882	0.0418791	0.0380004	0.047469	0.0230608	0.0504243	0.032044
Cys-less	0.00740986	0.0108536	0.00331117	0.0117196	0.00623853	0.0098529	0.00537514	0.00518715
