# Supplementary material for: Inhibitory proteins block substrate access by occupying the active site cleft of Bacillus subtilis intramembrane protease SpoIVFB
Source: eLife journal article supplement (doi:10.7554/elife.74275), 2022-03-28
Supplement: fig6-figsupp3-data1 [file figure supplement 3B complex to total ratios.xlsx]

## Sheet: Sheet1
figure supplement 3B
		15 minutes								30 minutes								45 minutes								60 minutes
		Set 1				Set 2				Set 1				Set 2				Set 1				Set 2				Set 1				Set 2
Plasmid		Complex	Monomer	Dimer	Ratio	Complex	Monomer	Dimer	Ratio	Complex	Monomer	Dimer	Ratio	Complex	Monomer	Dimer	Ratio	Complex	Monomer	Dimer	Ratio	Complex	Monomer	Dimer	Ratio	Complex	Monomer	Dimer	Ratio	Complex	Monomer	Dimer	Ratio
pSO168	F18C	1569498	3221841	565677	0.29298	1636778	4555870	1321628	0.217822	1968660	2564200	461380	0.394186	2001186	3865884	1085018	0.287854	2843100	2850440	560520	0.454601	3585920	5243740	440660	0.386817	2832240	2550460	619000	0.471906	3757687	2838638	396359	0.537374
pSO134	K24C	5999048	3268804	317130	0.62588	2019930	2019908	596376	0.435685	4294950	2484020	304634	0.606323	1321298	1609608	272448	0.412473	6016032	2569248	468512	0.664476	3772820	3028540	231700	0.536441	6762426	3167076	543862	0.645679	4127959	2506119	443004	0.583285
pSO136	Cys-less	65670	8439882	4699508	0.00497309	53333	4981572	3556648	0.00620761	363000	5563448	4035196	0.0364398	49412	6801520	3336124	0.00485047	25830	5983131	1128645	0.00361886	202426	6328862	5277098	0.0171426	85734	7208234	4509010	0.00726376	74119	5732471	6328862	0.00610764
	Ratios
	15	15	30	30	45	45	60	60
F18C	0.29298	0.217822	0.394186	0.287854	0.454601	0.386817	0.471906	0.537374
K24C	0.62588	0.435685	0.606323	0.412473	0.664476	0.536441	0.645679	0.583285
Cys-less	0.00497309	0.00620761	0.0364398	0.00485047	0.00361886	0.0171426	0.00726376	0.00610764
