# Supplementary material for: Inhibitory proteins block substrate access by occupying the active site cleft of Bacillus subtilis intramembrane protease SpoIVFB
Source: eLife journal article supplement (doi:10.7554/elife.74275), 2022-03-28
Supplement: fig6-figsupp3-data1 [file figure supplement 3D complex to total ratios.xlsx]

## Sheet: Sheet1
figure supplement 3D
		15 minutes								30 minutes								45 minutes								60 minutes
		Set 1				Set 2				Set 1				Set 2				Set 1				Set 2				Set 1				Set 2
Plasmid		Complex	Monomer	Dimer	Ratio	Complex	Monomer	Dimer	Ratio	Complex	Monomer	Dimer	Ratio	Complex	Monomer	Dimer	Ratio	Complex	Monomer	Dimer	Ratio	Complex	Monomer	Dimer	Ratio	Complex	Monomer	Dimer	Ratio	Complex	Monomer	Dimer	Ratio
pSO164	F18C	950140	3876080	1105280	0.160185	374500	1955360	300580	0.142372	2312376	5196312	1550098	0.255263	957163	3048987	1037229	0.189786	1055868	3490300	742588	0.199644	1151856	2799080	690023	0.248194	2066614	4998620	1246674	0.248633	1258769	3357471	919030	0.227409
pSO132	K24C	1519140	2769600	667640	0.306502	3781365	4476969	2045673	0.36698	2316960	3445480	1269820	0.329476	3088239	3438141	437976	0.443435	2428840	3469800	1459420	0.330092	2343745	2747913	970311	0.386631	2213680	3415320	1284580	0.320193	2468233	3064586	1062822	0.374222
pSO111	Cys-less	82060	3093772	898502	0.0201407	70946	2150781	137446	0.0300724	64592	2423696	762652	0.0198687	148542	3057879	201818	0.0435832	52164	1999389	351729	0.0217053	117230	2215191	268280	0.0450763	52206	2544762	688886	0.0158881	120821	2702693	163666	0.0404465
	Ratios
	15	15	30	30	45	45	60	60
F18C	0.160185	0.142372	0.255263	0.189786	0.199644	0.248194	0.248633	0.227409
K24C	0.306502	0.36698	0.329476	0.443435	0.330092	0.386631	0.320193	0.374222
Cys-less	0.0201407	0.0300724	0.0198687	0.0435832	0.0217053	0.0450763	0.0158881	0.0404465
