# Supplementary material for: Inhibitory proteins block substrate access by occupying the active site cleft of Bacillus subtilis intramembrane protease SpoIVFB
Source: eLife journal article supplement (doi:10.7554/elife.74275), 2022-03-28
Supplement: fig6-figsupp3-data1 [file figure supplement 3F complex to total ratios.xlsx]

## Sheet: Sheet1
figure supplement 3F
		15 minutes								30 minutes								45 minutes								60 minutes
		Set 1				Set 2				Set 1				Set 2				Set 1				Set 2				Set 1				Set 2
Plasmid		Complex	Monomer	Dimer	Ratio	Complex	Monomer	Dimer	Ratio	Complex	Monomer	Dimer	Ratio	Complex	Monomer	Dimer	Ratio	Complex	Monomer	Dimer	Ratio	Complex	Monomer	Dimer	Ratio	Complex	Monomer	Dimer	Ratio	Complex	Monomer	Dimer	Ratio
pSO236	F18C	674793	2301768	1682163	0.144845	447280	2287700	1942720	0.0956196	838880	2712180	2516340	0.13826	505540	2382980	675360	0.141851	871872	2657302	3929713	0.11689	470799	2189586	1634829	0.10961	563800	1524740	1926520	0.140421	431642	1889987	1123033	0.125308
pSO237	K24C	508599	2126880	1379637	0.126671	534600	2391060	2510660	0.0983386	1027780	2595440	2173620	0.1773	520000	2562840	695160	0.137639	822662	2699387	3349434	0.119721	399819	1424745	1037001	0.13972	544780	1455160	1783400	0.143994	877914	2236433	1181686	0.204355
pSO230	Cys-less	71568	2023119	877758	0.0240771	123720	2775160	2614360	0.0224405	76000	3770340	3765240	0.00998479	313200	2319080	677600	0.0946258	111948	2961340	1120525	0.0266936	104034	1911000	1267077	0.0316973	84600	2766320	3398640	0.013537	266000	2676948	989710	0.0676387
	Ratios
	15	15	30	30	45	45	60	60
F18C	0.144845	0.0956196	0.13826	0.141851	0.11689	0.10961	0.140421	0.125308
K24C	0.126671	0.0983386	0.1773	0.137639	0.119721	0.13972	0.143994	0.204355
Cys-less	0.0240771	0.0224405	0.00998479	0.0946258	0.0266936	0.0316973	0.013537	0.0676387
