# Supplementary material for: Inhibitory proteins block substrate access by occupying the active site cleft of Bacillus subtilis intramembrane protease SpoIVFB
Source: eLife journal article supplement (doi:10.7554/elife.74275), 2022-03-28
Supplement: fig6-figsupp3-data1 [file readme.docx]

Some of the immunoblot images (raw) for experiments with the following plasmids can be found in Figure 6-figure supplement 1-source data 1: pSO168, pSO134, and pSO136.
