# Supplementary material for: Inhibitory proteins block substrate access by occupying the active site cleft of Bacillus subtilis intramembrane protease SpoIVFB
Source: eLife journal article supplement (doi:10.7554/elife.74275), 2022-03-28
Supplement: fig6-figsupp4-data1 [file figure supplement 4C complex to total ratios.xlsx]

## Sheet: Sheet1
figure supplement 4C
		15 minutes								30 minutes								45 minutes								60 minutes
		Set 1				Set 2				Set 1				Set 2				Set 1				Set 2				Set 1				Set 2
Plasmid		Complex	Monomer	Dimer	Ratio	Complex	Monomer	Dimer	Ratio	Complex	Monomer	Dimer	Ratio	Complex	Monomer	Dimer	Ratio	Complex	Monomer	Dimer	Ratio	Complex	Monomer	Dimer	Ratio	Complex	Monomer	Dimer	Ratio	Complex	Monomer	Dimer	Ratio
pSO91	MBPD27BofA	581900	6612660	806140	0.0727311	242960	5978860	429040	0.0365306	698349	7238721	2121175	0.0694305	195420	5333720	563600	0.0320742	698236	8707446	2152656	0.0604097	250059	5873204	250059	0.0392353	732732	6799694	2131118	0.0758244	244359	5950458	976600	0.034074
pSO110	Cys-less MBPD27BofA	27240	4264320	430160	0.00576908	38620	6039420	438680	0.00592629	41055	7440109	1784225	0.00443101	42740	5859700	645960	0.00652679	30536	6254512	843612	0.00428355	21052	5107827	21052	0.00408782	12144	7048052	1913868	0.00135323	37487	7092852	1161394	0.00452101
pSO226	BofA	334200	7124260	1158940	0.038782	358580	4160740	1457940	0.0599907	456460	4963460	2196700	0.0599295	419740	4500420	1390900	0.0665086	801297	7697466	2207268	0.0748454	360140	3221820	1274720	0.0741535	314349	4274340	1963353	0.0479773	472820	2555840	1573040	0.102749
pSO229	Cys-less BofA	46540	6997020	1778420	0.00527546	72940	5975680	2510680	0.00852172	56200	4264500	1862600	0.009089	66000	5522740	2733040	0.007931	119826	6531651	2122281	0.0136573	39840	2885080	1604720	0.0087954	79674	5995563	2575377	0.00921021	19180	3721440	2468060	0.00308922
	Ratios
	15	15	30	30	45	45	60	60
MBPD27BofA	0.0727311	0.0365306	0.0694305	0.0320742	0.0604097	0.0392353	0.0758244	0.034074
Cys-less MBPD27BofA	0.00576908	0.00592629	0.00443101	0.00652679	0.00428355	0.00408782	0.00135323	0.00452101
BofA	0.038782	0.0599907	0.0599295	0.0665086	0.0748454	0.0741535	0.0479773	0.102749
Cys-less BofA	0.00527546	0.00852172	0.009089	0.007931	0.0136573	0.0087954	0.00921021	0.00308922
