# Supplementary material for: Inhibitory proteins block substrate access by occupying the active site cleft of Bacillus subtilis intramembrane protease SpoIVFB
Source: eLife journal article supplement (doi:10.7554/elife.74275), 2022-03-28
Supplement: fig6-figsupp4-data1 [file figure supplement 4F complex to total ratios.xlsx]

## Sheet: Sheet1
figure supplement 4F
		15 minutes								30 minutes								45 minutes								60 minutes
		Set 1				Set 2				Set 1				Set 2				Set 1				Set 2				Set 1				Set 2
Plasmid		Complex	Monomer	Dimer	Ratio	Complex	Monomer	Dimer	Ratio	Complex	Monomer	Dimer	Ratio	Complex	Monomer	Dimer	Ratio	Complex	Monomer	Dimer	Ratio	Complex	Monomer	Dimer	Ratio	Complex	Monomer	Dimer	Ratio	Complex	Monomer	Dimer	Ratio
pSO93	MBPD27BofA	324280	2934180	324280	0.0905117	310408	3882239	553932	0.0653962	412146	3337173	1406118	0.079944	301277	2656201	273401	0.0932492	234454	3433518	541574	0.0556958	461960	4005040	1030260	0.0840346	314160	4515882	749868	0.056302	438540	3031140	521280	0.109883
pSO112	Cys-less MBPD27BofA	30180	1411960	348480	0.0168545	41745	3092511	494960	0.0115025	38031	1830738	798105	0.0142605	29969	3435395	643678	0.00729343	46552	3106290	640156	0.0122731	38080	2137940	420460	0.014666	44079	2748774	575127	0.0130877	21880	2290120	459560	0.00789447
pSO228	BofA	470668	2990768	1864456	0.0883736	145200	1807780	188360	0.067808	425172	2516998	1568842	0.094252	297600	2266980	508760	0.0968328	408765	2097774	1188453	0.110627	152481	1927464	203805	0.0667678	411831	2032968	1550325	0.103083	377727	2420166	667086	0.109013
pSO231	Cys-less BofA	38148	2094730	546568	0.0142373	11720	2619520	706660	0.00351119	9988	3404522	2335652	0.00173699	11180	1610140	254700	0.00595942	13251	2285325	1601733	0.00339742	22575	1157688	69909	0.0180575	27363	2442531	1928598	0.006221	12726	2186016	658938	0.00445326
	Ratios
	15	15	30	30	45	45	60	60
MBPD27BofA	0.0905117	0.0653962	0.079944	0.0932492	0.0556958	0.0840346	0.056302	0.109883
Cys-less MBPD27BofA	0.0168545	0.0115025	0.0142605	0.00729343	0.0122731	0.014666	0.0130877	0.00789447
BofA	0.0883736	0.067808	0.094252	0.0968328	0.110627	0.0667678	0.103083	0.109013
Cys-less BofA	0.0142373	0.00351119	0.00173699	0.00595942	0.00339742	0.0180575	0.006221	0.00445326
