# Supplementary material for: Inhibitory proteins block substrate access by occupying the active site cleft of Bacillus subtilis intramembrane protease SpoIVFB
Source: eLife journal article supplement (doi:10.7554/elife.74275), 2022-03-28
Supplement: fig6-figsupp5-data1 [file readme.docx]

The immunoblot images (raw) for experiments with the following plasmids can be found in Figure 5-figure supplement 3-source data 1 in the figure supplement 3C folder: pSO120, pSO127, and pSO245.
