# Supplementary material for: Inhibitory proteins block substrate access by occupying the active site cleft of Bacillus subtilis intramembrane protease SpoIVFB
Source: eLife journal article supplement (doi:10.7554/elife.74275), 2022-03-28
Supplement: fig7-data1 [file readme.docx]

The PyMOL session file (Figure 7C) was derived from the model ‘fb.sigk.bofa.fa’ of a SpoIVFB tetramer in complex with one molecule each of full-length BofA and parts of Pro-K (residues 38-114) and SpoIVFA (residues 65-111), by hiding the B, C, and D chains of SpoIVFB. The images shown in Figure 7 A and B were then derived by hiding additional parts of the model.
