# Supplementary material for: Inhibitory proteins block substrate access by occupying the active site cleft of Bacillus subtilis intramembrane protease SpoIVFB
Source: eLife journal article supplement (doi:10.7554/elife.74275), 2022-03-28
Supplement: fig7-figsupp1-data1 [file readme.docx]

The PyMOL session file (fig sup 1) was derived from the model ‘fb.sigk’ of a SpoIVFB tetramer in complex with part of one molecule of Pro-K (residues 1-114). The side view was rotated and the B, C, and D chains of SpoIVFB were hidden to produce the other images.
