# Supplementary material for: Inhibitory proteins block substrate access by occupying the active site cleft of Bacillus subtilis intramembrane protease SpoIVFB
Source: eLife journal article supplement (doi:10.7554/elife.74275), 2022-03-28
Supplement: fig7-figsupp2-data1 [file readme.docx]

The PyMOL session file (fig sup 2) was derived from the Figure 7C PyMOL session file in the Figure 7-source data 1 folder by hiding all chains except full-length BofA and coloring the N48, N61, and T64 side chains blue. The side view was then enlarged, cropped, and rotated to produce the other images.
